# Supplementary figures and images for: Airflow and optic flow mediate antennal positioning in flying honeybees
Source: eLife journal article supplement (doi:10.7554/elife.14449), 2016-04-20

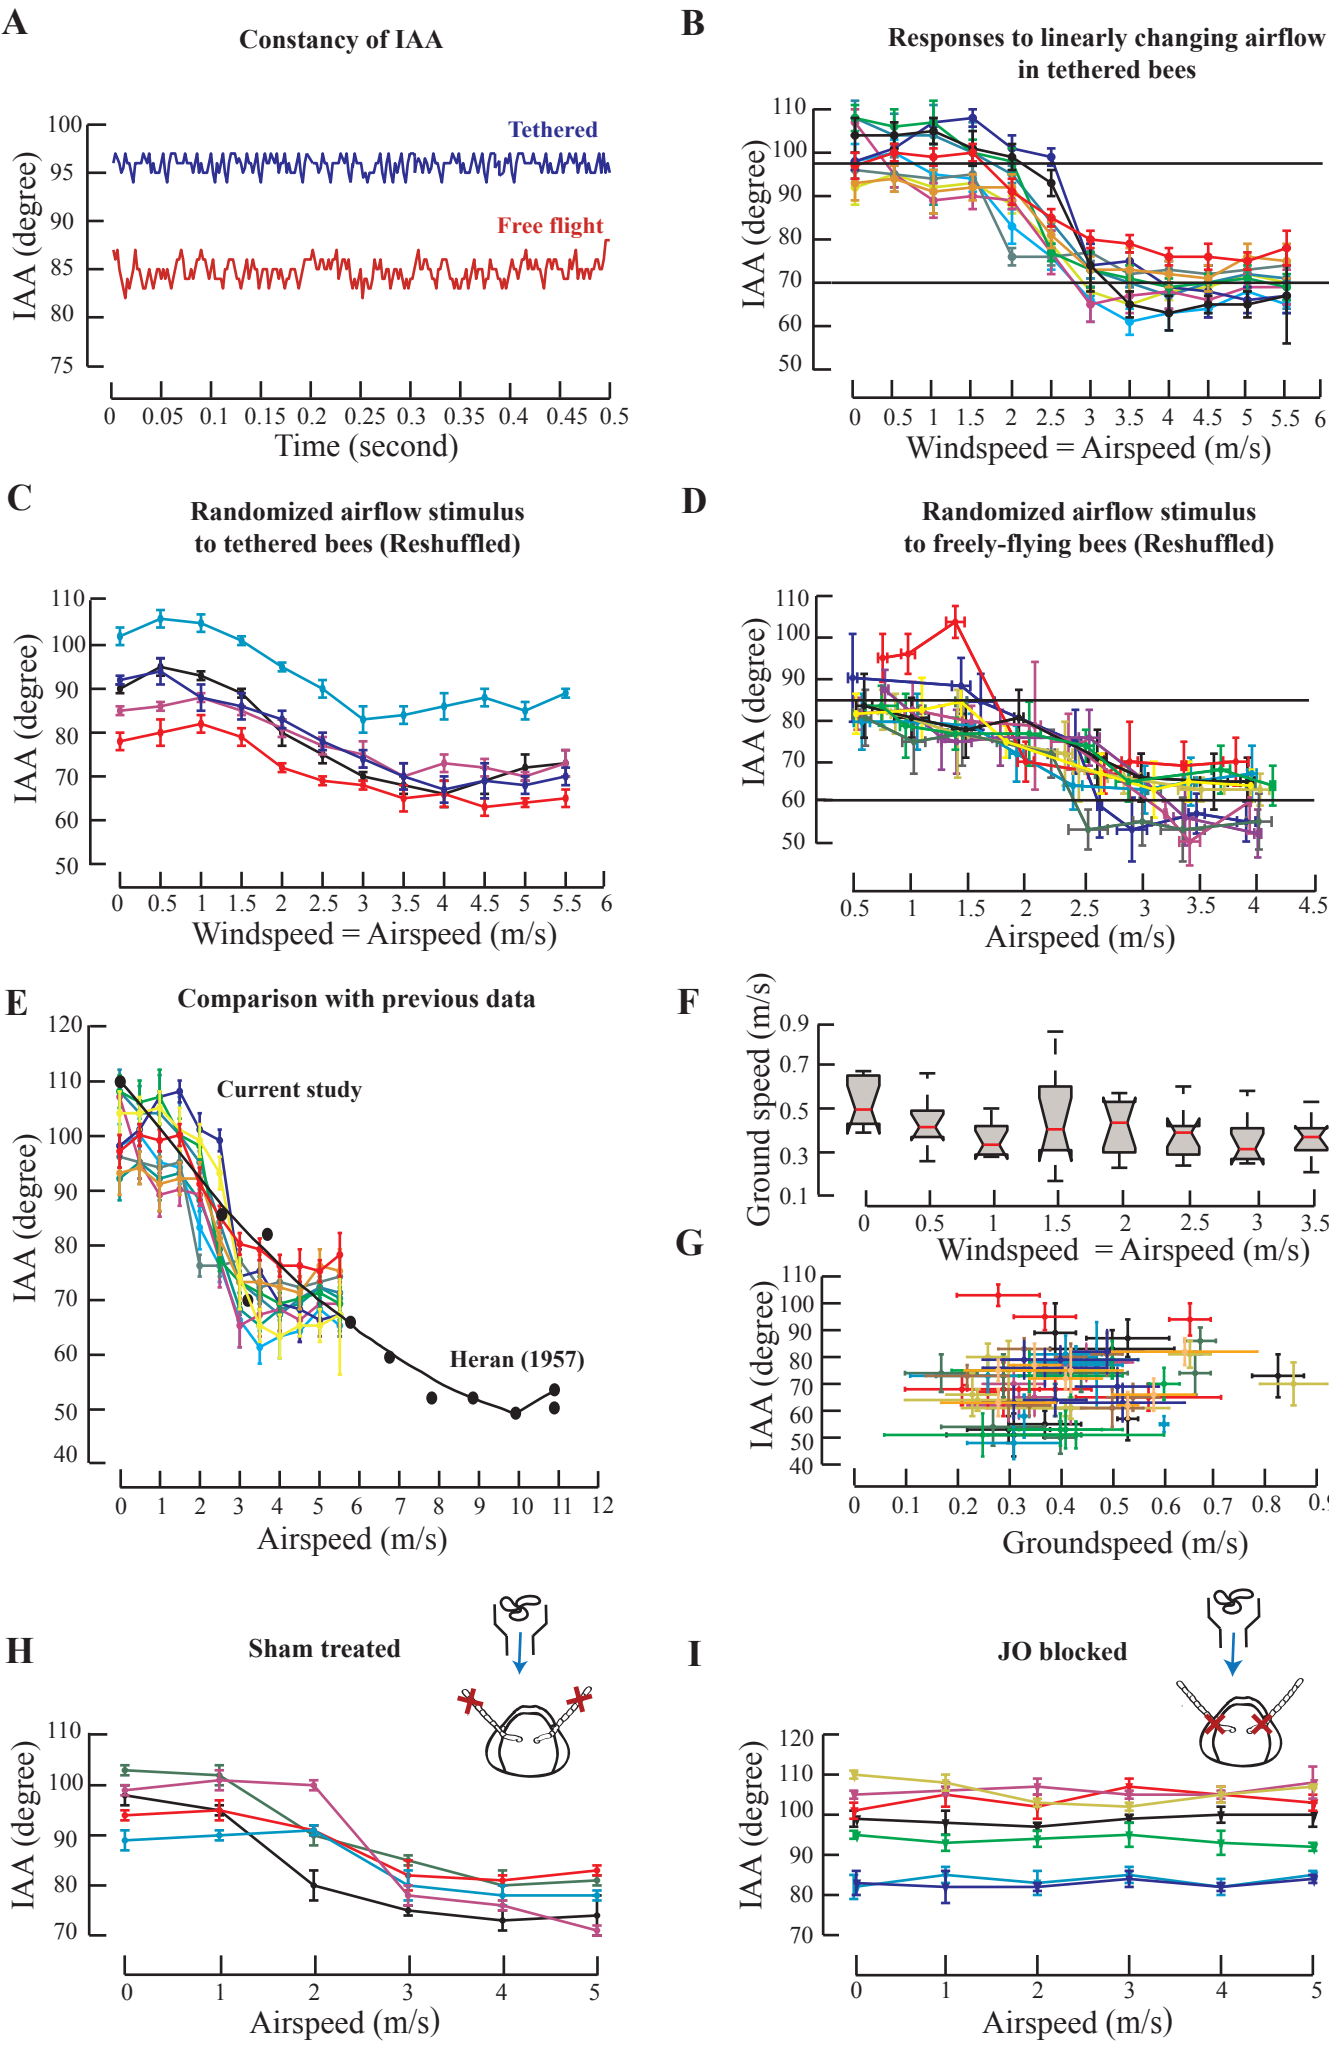

Supplement: supp [file elife_poa_e14449_Figure_1_figure_supplement_1.pdf › elife_poa_e14449_Figure_1_figure_supplement_1.pdf]

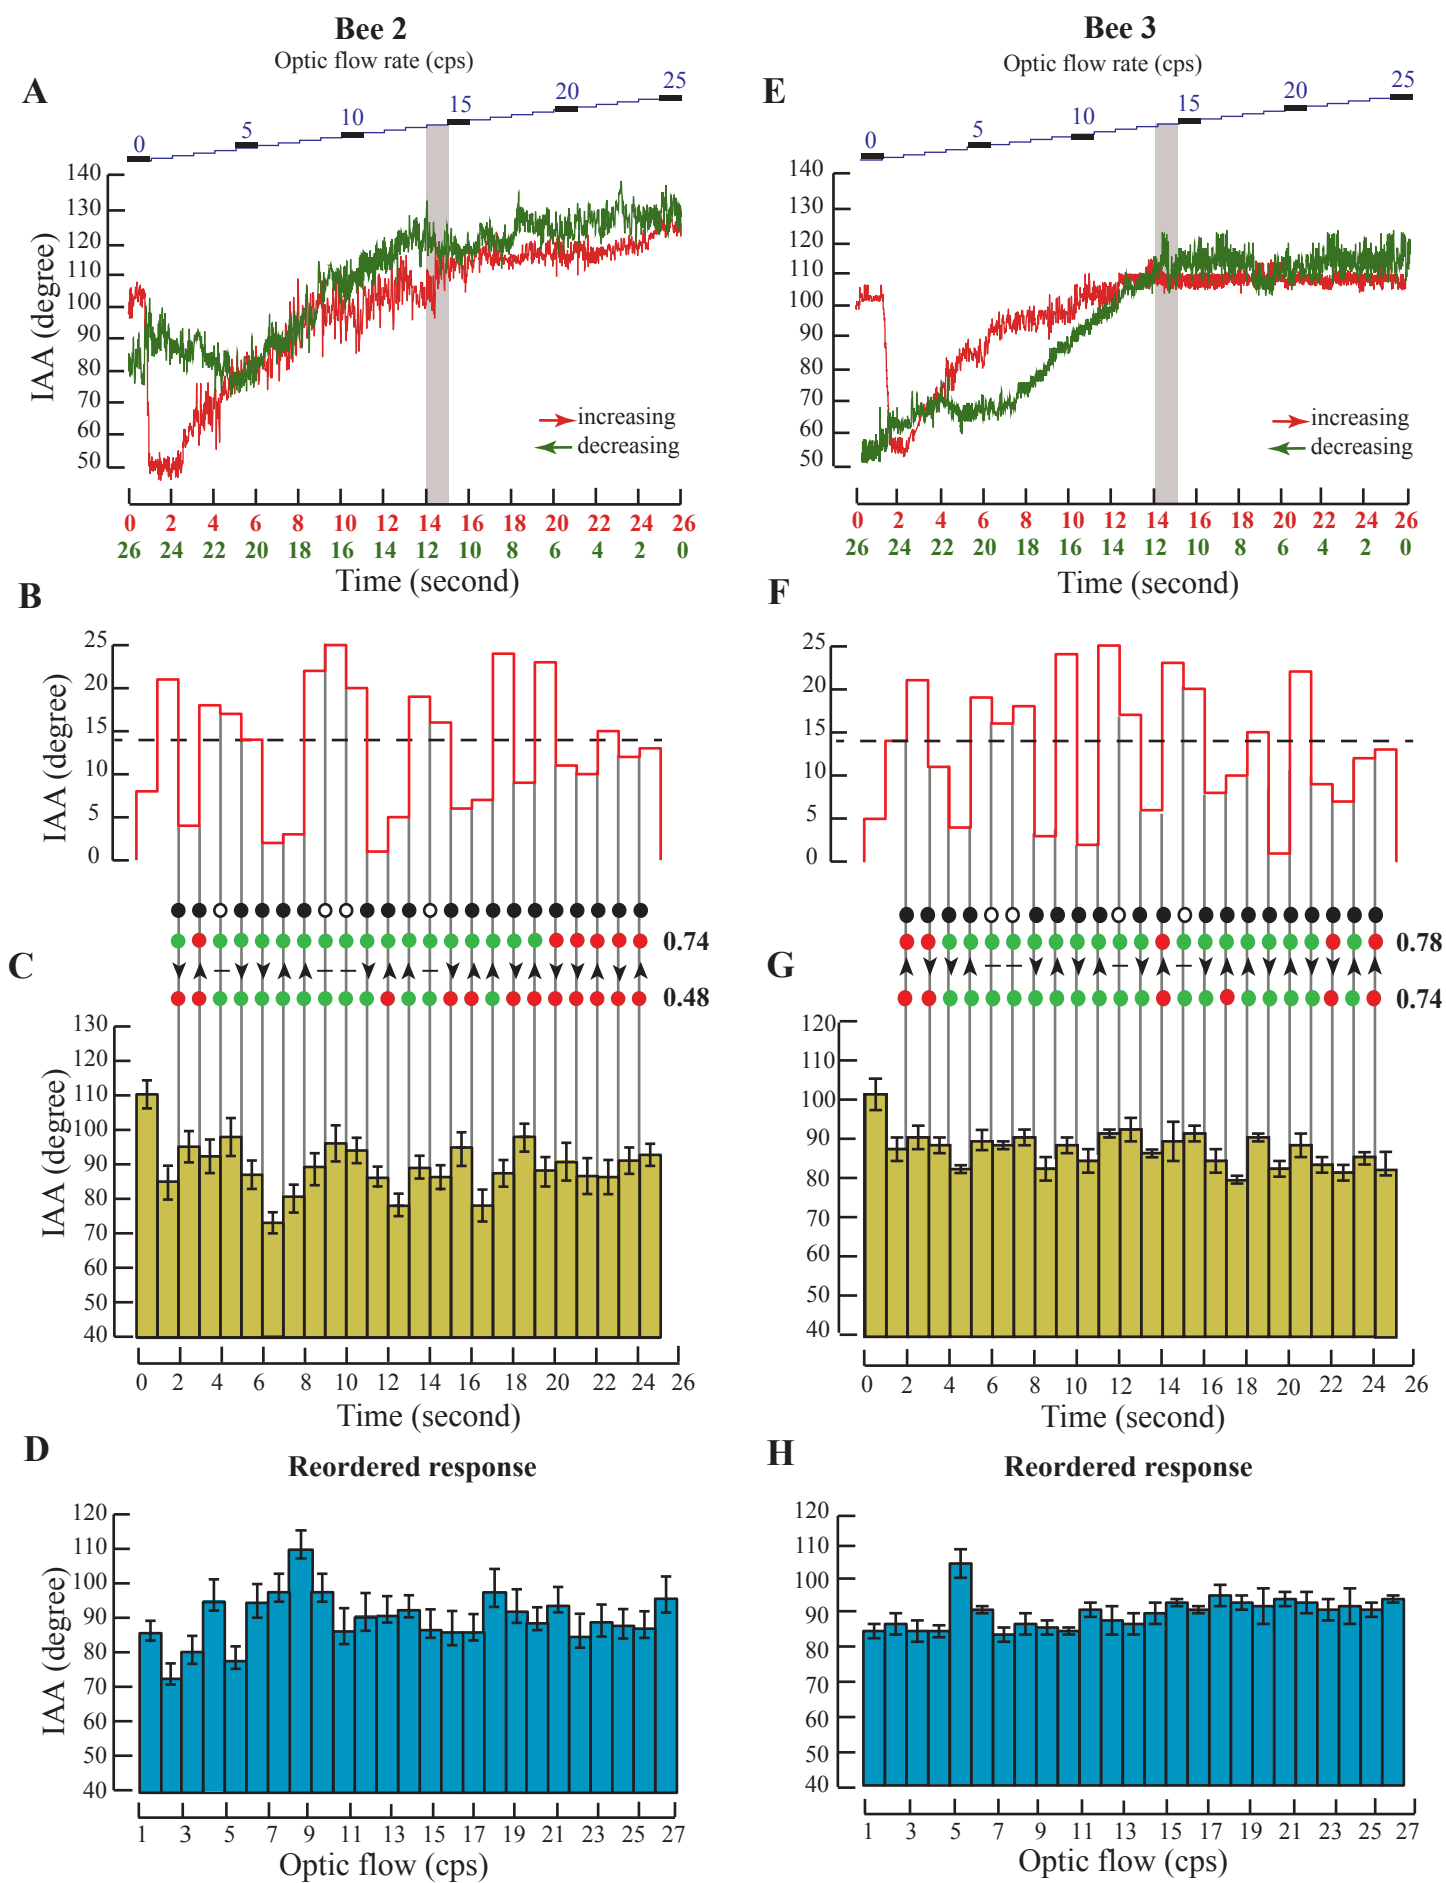

Supplement: supp [file elife_poa_e14449_Figure_2_figure_supplement_1.pdf › elife_poa_e14449_Figure_2_figure_supplement_1.pdf]

A

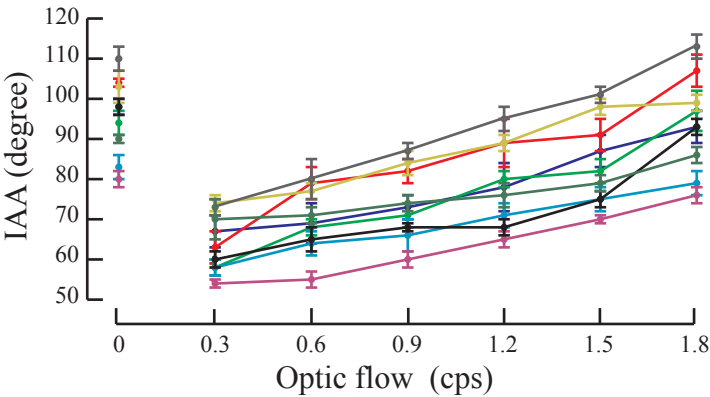

B

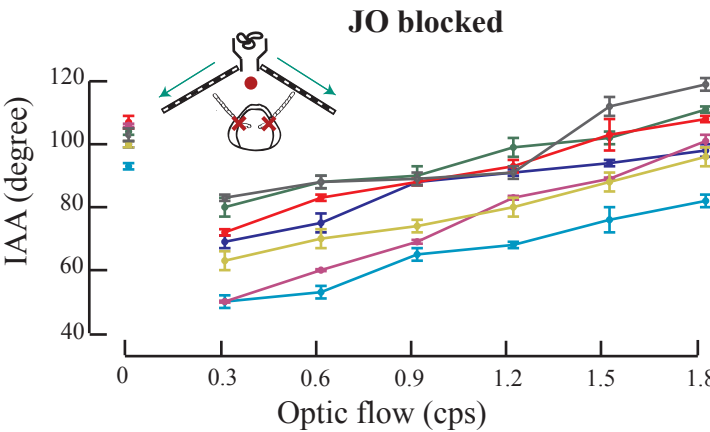

Supplement: supp [file elife_poa_e14449_Figure_2_figure_supplement_2.pdf › elife_poa_e14449_Figure_2_figure_supplement_2.pdf]
